# Supplementary material for: The Effect of Learning Burnout on Sleep Quality in Primary School Students: The Mediating Role of Mental Health
Source: MDPI journal article supplement (doi:10.3390/healthcare10102076), 2022-10-19
Supplement: s1 [file s1]

Table S1 PSQI scores 1

|                                                                                                   | <i>N</i> | Minimum | Maximum | $\bar{x} \pm s$    |
|---------------------------------------------------------------------------------------------------|----------|---------|---------|--------------------|
| 1. During the past month, when have you usually gone to bed at night?                             | 825      | 8:00 PM | 1:30 AM | 9.7220 $\pm$ 0.757 |
| 2. During the past month, how long(in minutes) has it usually take you to fall asleep each night? | 825      | 1       | 99      | 19.19 $\pm$ 16.067 |
| 3. During the past month, when have you usually gotten up in the morning?                         | 825      | 5.00    | 8.00    | 6.8273 $\pm$ 0.402 |
| 4. During the past month, how many hours of actual sleep did you get at night?                    | 825      | 4.0     | 11.0    | 8.676 $\pm$ 1.038  |

Table S2 PSQI scores 2 [*N*(%)]

|     | Not during the past month | Less than once a week | Once or twice a week | Three or more times a week |
|-----|---------------------------|-----------------------|----------------------|----------------------------|
| Q5a | 447(54.2%)                | 131(15.9%)            | 116(14.1%)           | 131(15.9%)                 |
| Q5b | 423(51.3%)                | 174(21.1%)            | 130(15.8%)           | 98(11.9%)                  |
| Q5c | 490(59.4%)                | 209(25.3%)            | 83(10.1%)            | 43(5.2%)                   |
| Q5d | 724(87.8%)                | 58(7.0%)              | 26(3.2%)             | 17(2.1%)                   |
| Q5e | 717(86.9%)                | 66(8.0%)              | 22(2.7%)             | 20(2.4%)                   |
| Q5f | 607(73.6%)                | 112(13.6%)            | 69(8.4%)             | 37(4.5%)                   |
| Q5g | 470(57%)                  | 137(16.6%)            | 117(14.2%)           | 101(12.2%)                 |
| Q5h | 458(55.5%)                | 181(21.9%)            | 101(12.2%)           | 85(10.3%)                  |
| Q5i | 727(88.1%)                | 57(6.9%)              | 22(2.7%)             | 19(2.3%)                   |
| Q5j | 664(80.5%)                | 67(8.1%)              | 53(6.4%)             | 41(5.0%)                   |

Table S3 PSQI scores 3

|                                                                                                                                     | <i>N</i> | Percentage(%) |
|-------------------------------------------------------------------------------------------------------------------------------------|----------|---------------|
| 6. During the past month, how would you rate your sleep quality overall?                                                            |          |               |
| Very good                                                                                                                           | 255      | 30.9          |
| Fairly good                                                                                                                         | 442      | 53.6          |
| Fairly bad                                                                                                                          | 104      | 12.6          |
| Very bad                                                                                                                            | 24       | 2.9           |
| 7. During the past month, how often have you taken medicine(prescribed or over the counter)to help you sleep?                       |          |               |
| Not during the past month                                                                                                           | 813      | 98.5          |
| Less than once a week                                                                                                               | 8        | 1.0           |
| Once or twice a week                                                                                                                | 2        | 0.2           |
| Three or more times a week                                                                                                          | 2        | 0.2           |
| 8. During the past month, how often have you had trouble staying awake while driving, eating meals, or engaging in social activity? |          |               |
| Not during the past month                                                                                                           | 329      | 39.9          |
| Less than once a week                                                                                                               | 235      | 28.5          |
| Once or twice a week                                                                                                                | 143      | 17.3          |

|                                                                                                                      |     |      |
|----------------------------------------------------------------------------------------------------------------------|-----|------|
| Three or more times a week                                                                                           | 118 | 14.3 |
| 9. During the past month, how much of a problem has it been for you to keep up enough enthusiasm to get things done? |     |      |
| No problem at all                                                                                                    | 312 | 39.9 |
| Only a very slight problem                                                                                           | 389 | 28.5 |
| Only a very slight problem                                                                                           | 88  | 17.3 |
| A very big problem                                                                                                   | 36  | 14.3 |

Table S4 ASBI total score and score details of each factor

| Variables               | Maximum | Maximum | $\bar{x} \pm s$    | Ranking |
|-------------------------|---------|---------|--------------------|---------|
| Mental health scores    | 0       | 24      | 4.46 $\pm$ 4.404   | —       |
| Learning burnout scores |         |         |                    |         |
| Exhaustion              | 20      | 4       | 10.19 $\pm$ 4.678  | 2       |
| Learning cynicism       | 25      | 5       | 8.71 $\pm$ 4.213   | 3       |
| Reduced efficacy        | 31      | 7       | 17.33 $\pm$ 4.726  | 1       |
| Total                   | 72      | 18      | 36.23 $\pm$ 10.383 |         |

Table S5 Describe statistics and correlation analysis results

|                  | Learning burnout | Mental health | Sleep quality |
|------------------|------------------|---------------|---------------|
| Sleep quality    | 0.505**          | 0.551**       | 1             |
| Mental health    | 0.542**          | 1             |               |
| Learning burnout | 1                |               |               |

Note: "\*\*\*" means that at the level of 0.01 (two tails), the correlation is significant.

Table S6 Breakdown of total effect, direct effect and intermediary effect

|                     | Effect | Boot SE | BootLLCI | BootULCI | Proportion in total effect (%) |
|---------------------|--------|---------|----------|----------|--------------------------------|
| Intermediary effect | 0.052  | 0.007   | 0.039    | 0.065    | 41.27                          |
| Direct effect       | 0.074  | 0.009   | 0.056    | 0.092    | 58.73                          |
| Total effect        | 0.126  | 0.008   | 0.110    | 0.142    |                                |
